# Supplementary material for: Ex-vivo cultured human corneoscleral segment model to study the effects of glaucoma factors on trabecular meshwork
Source: PubMed Central journal article supplement (PMC7314024; doi:10.1371/journal.pone.0232111), 2020-06-24

Fig.4C

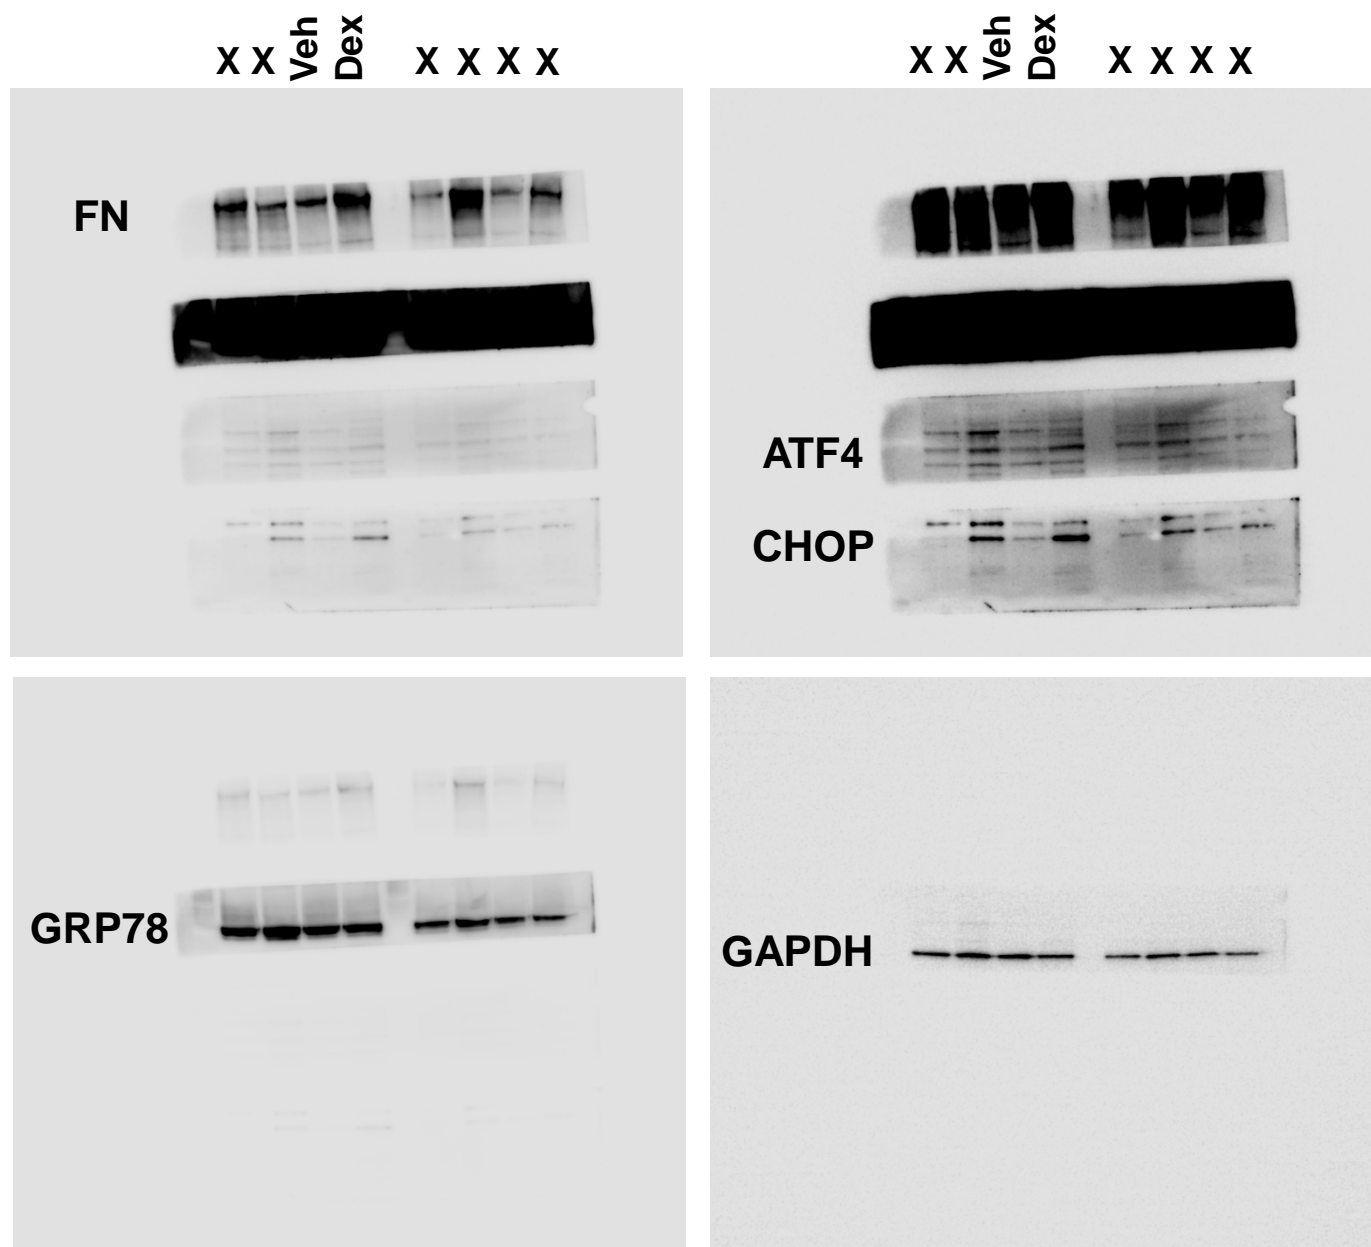

**Fig.4E**

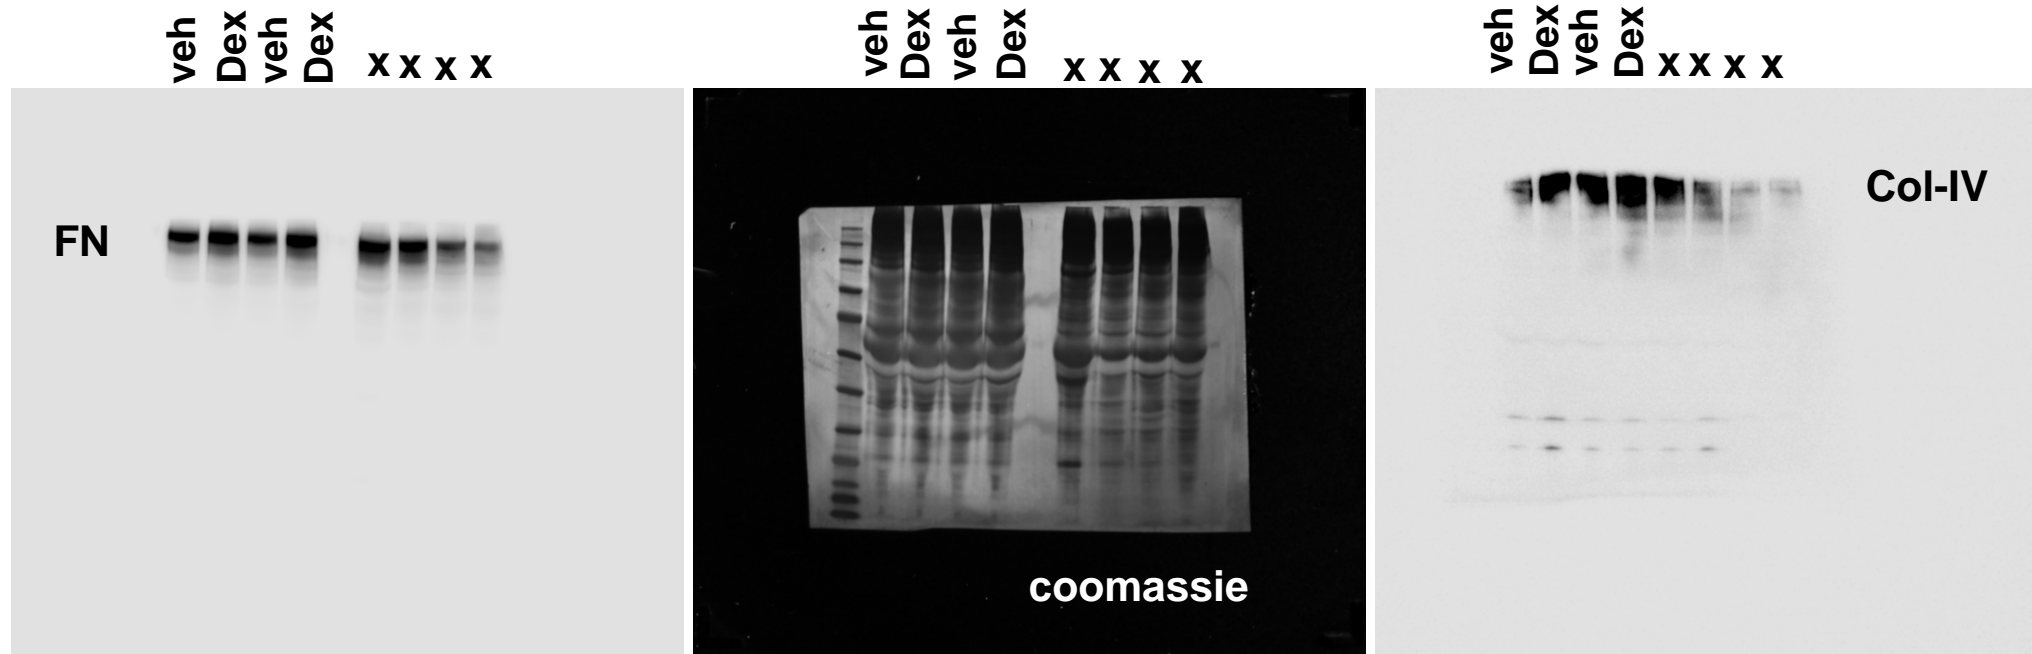

Note: We have loaded an equal amount of same samples on two different blots and stained one with FN and one with Col-IV. When we tried the same blot with both antibodies (FN and Col-IV , will give almost similar band sizes), one after the other after stripping the blot, the staining did not work.

Fig.5C

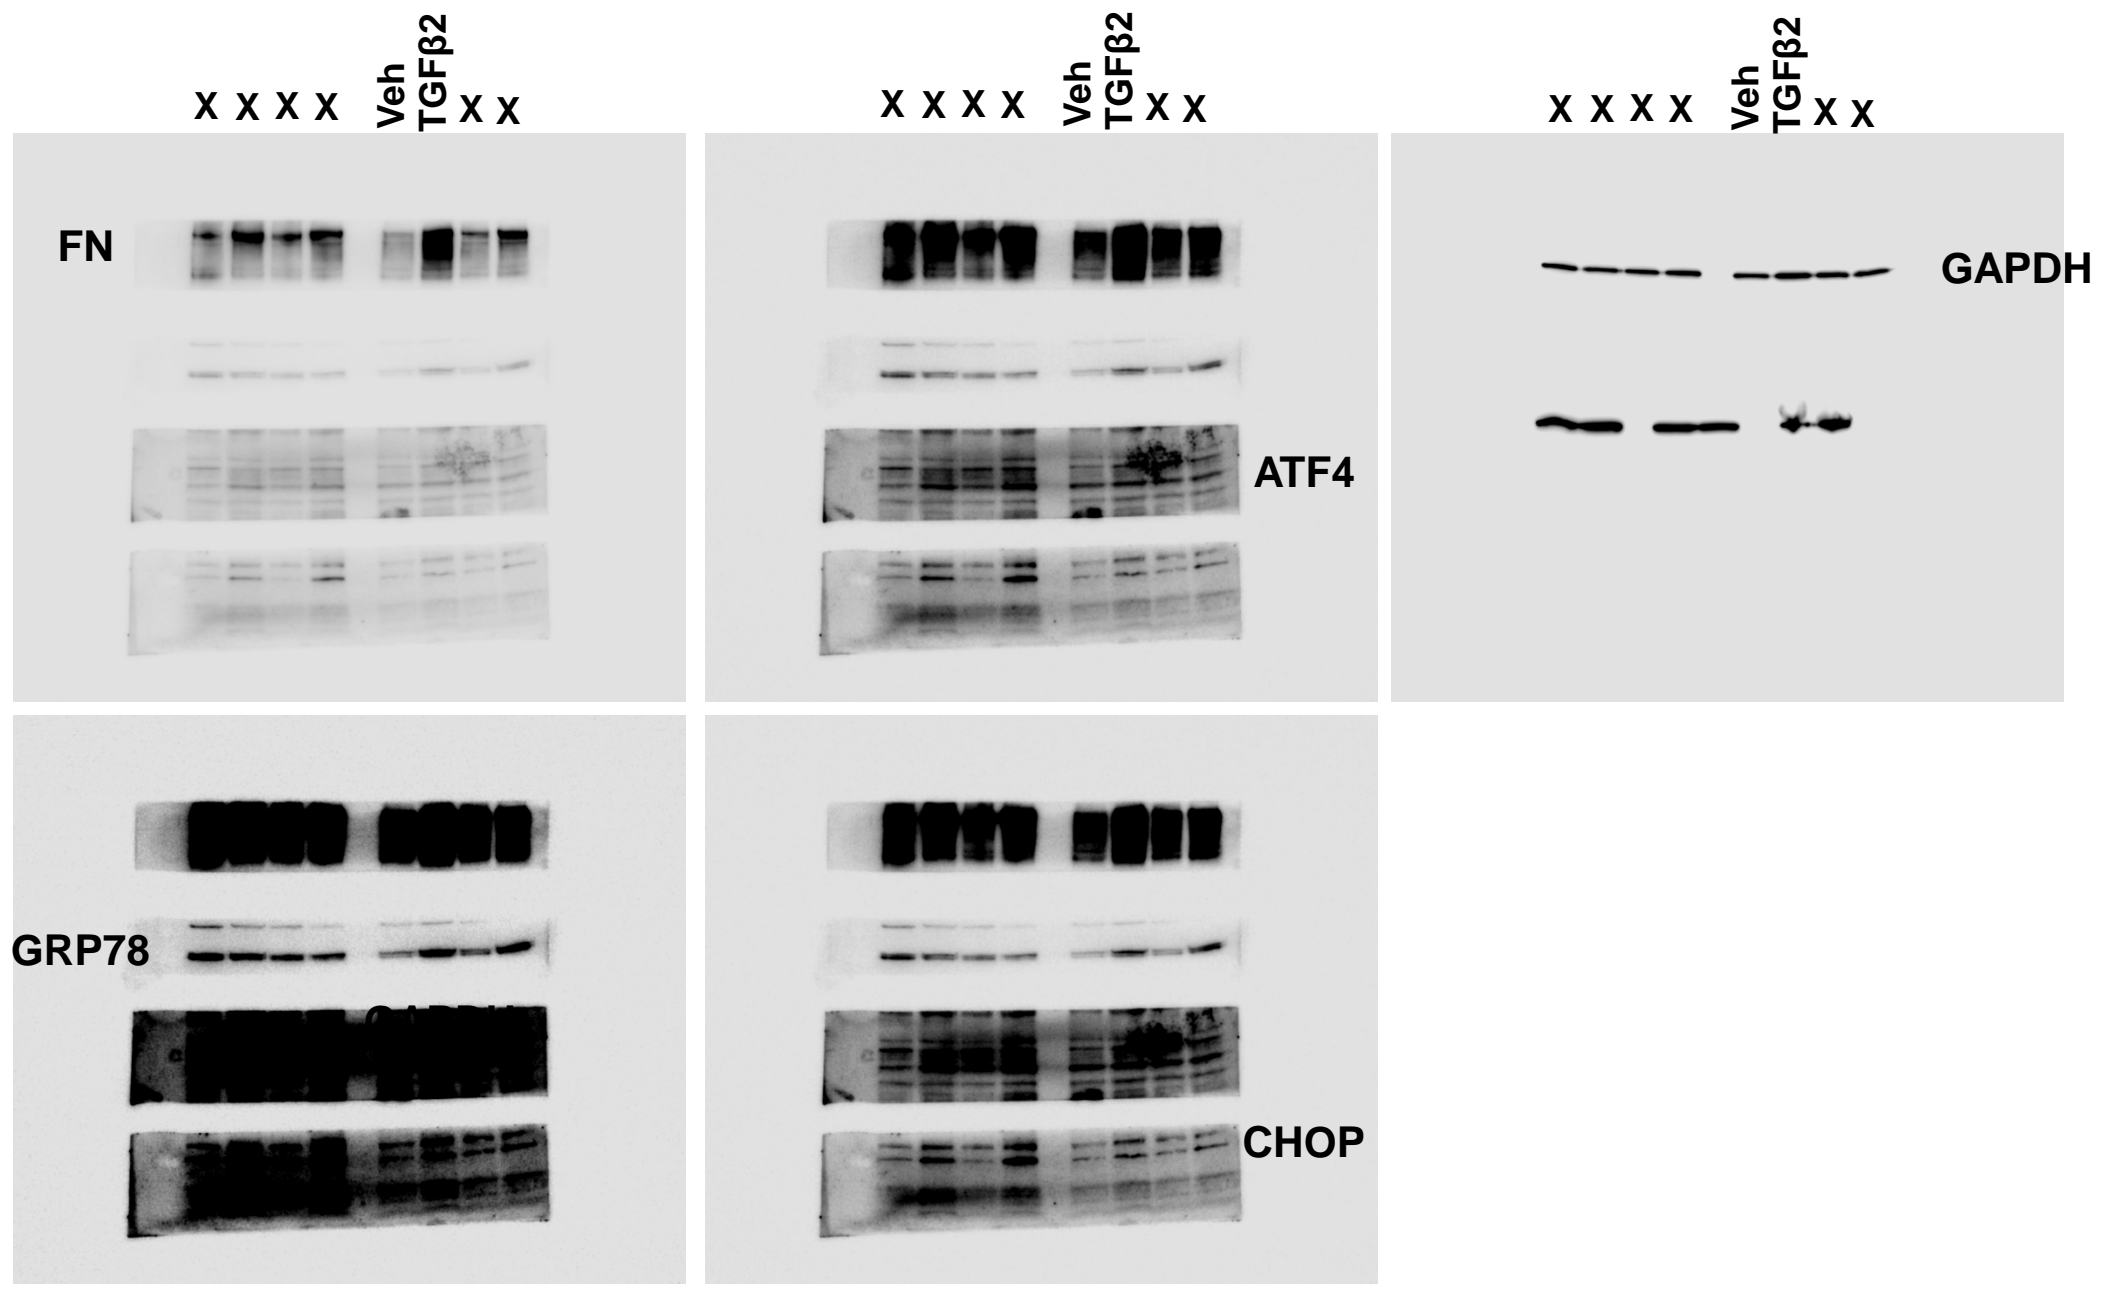



**Fig.6D**

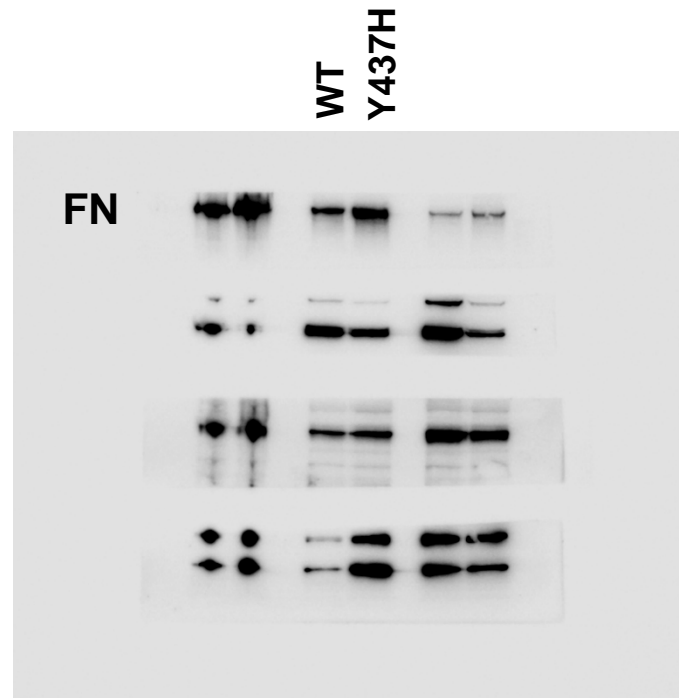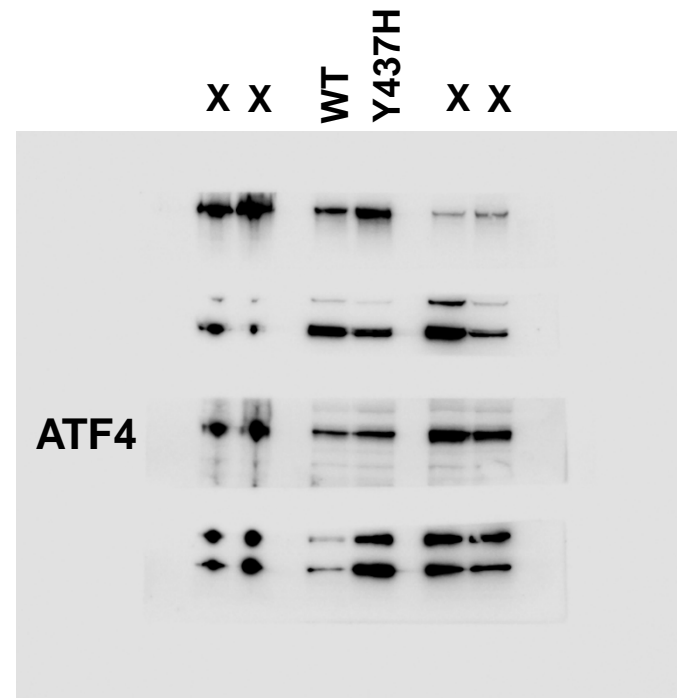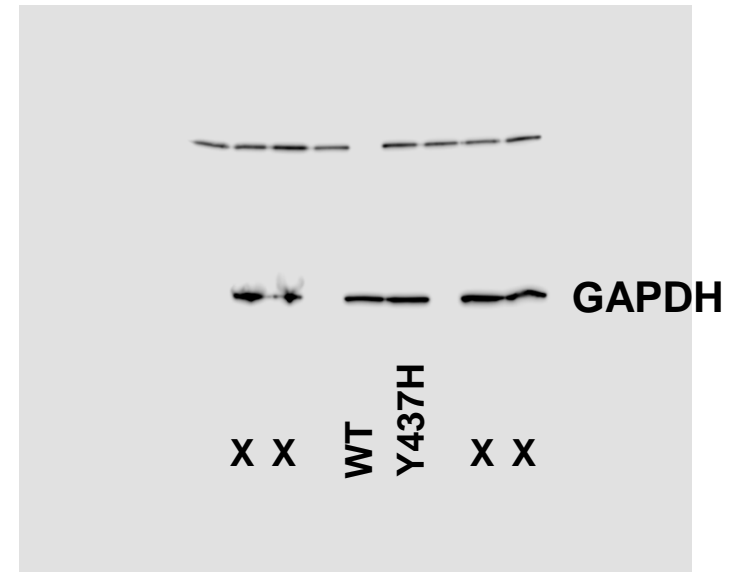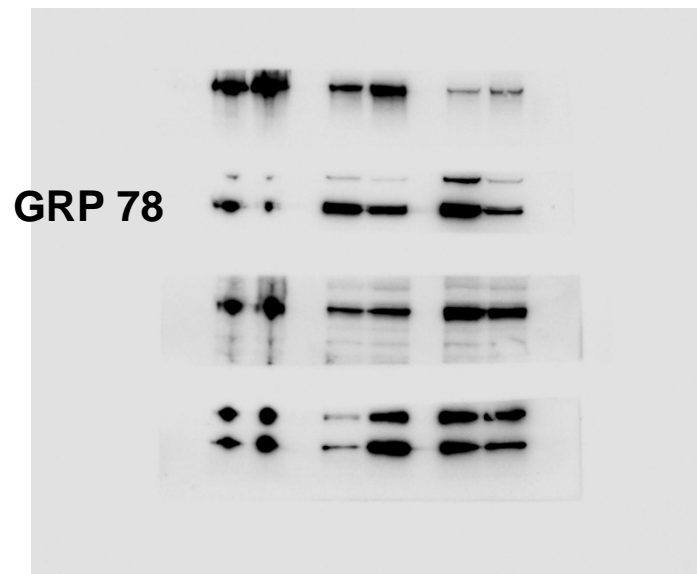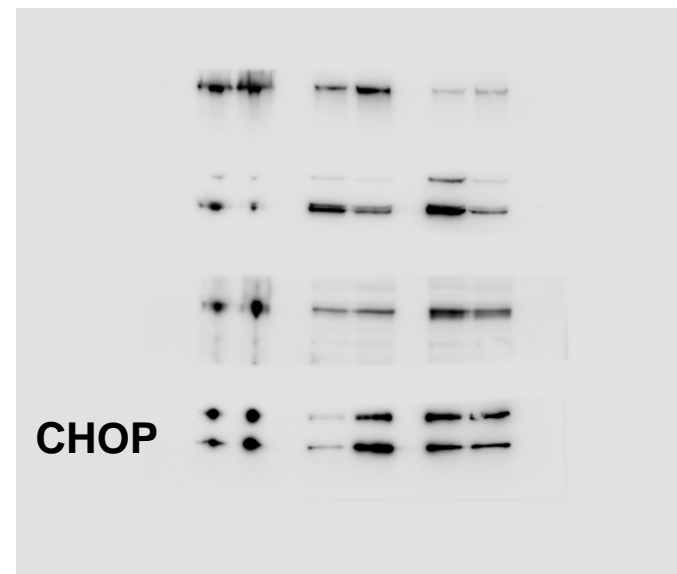

Fig.6F

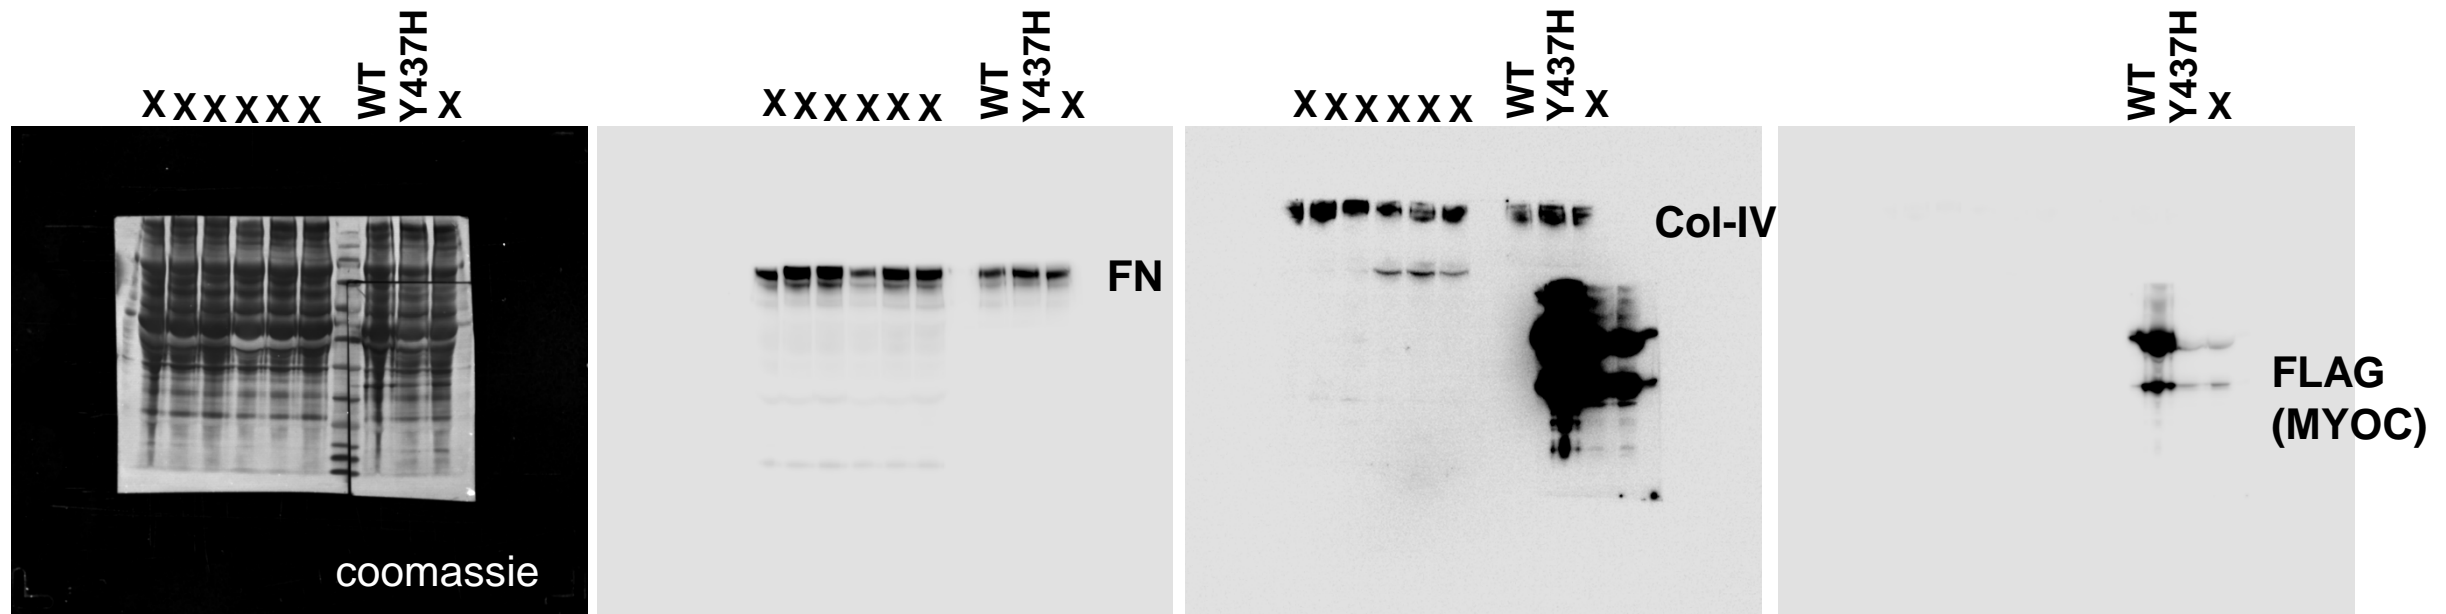

Supplement: pone.0232111.s001.pdf [file pone.0232111.s001.pdf]
